# Supplementary material for: Plasma Metabolomic Profiling of Patients with Diabetes-Associated Cognitive Decline
Source: PubMed Central journal article supplement (PMC4431856; doi:10.1371/journal.pone.0126952), 2015-05-14
Supplement: pone.0126952.s004.pdf [file pone.0126952.s004.pdf]

|                                           |                                   |       |       |       |        |       |       |       |        |       |       |       |       |
|-------------------------------------------|-----------------------------------|-------|-------|-------|--------|-------|-------|-------|--------|-------|-------|-------|-------|
| N-palmitoyl glutamic acid                 | others                            | 1.255 | 0.009 | 0.019 | -2.144 |       |       |       |        |       |       |       |       |
| Phytosphingosine                          | Sphingolipid metabolism           | 1.975 | 0.008 | 0.017 | -0.837 | 3.104 | 0.000 | 0.000 | 1.627  | 4.310 | 0.000 | 0.000 | 2.508 |
| 25-hydroxy-cholesterol                    | Primary bile acid biosynthesis    | 2.205 | 0.002 | 0.009 | -1.551 |       |       |       |        |       |       |       |       |
| N-stearoyl taurine                        | others                            | 1.419 | 0.030 | 0.042 | -1.124 | 1.642 | 0.007 | 0.016 | -1.579 |       |       |       |       |
| N-palmitoyl histidine                     | others                            | 1.406 | 0.017 | 0.029 | -0.985 |       |       |       |        |       |       |       |       |
| N-Oleoyl-L-Serine                         | others                            | 1.487 | 0.023 | 0.034 | -0.685 |       |       |       |        |       |       |       |       |
| Sphinganine                               | Sphingolipid metabolism           | 2.106 | 0.003 | 0.012 | -0.416 | 2.446 | 0.000 | 0.000 | 0.669  | 1.124 | 0.012 | 0.045 | 0.783 |
| 15(S)-15-methyl PGF2 $\alpha$ ethyl amide | others                            | 1.347 | 0.038 | 0.050 | -0.916 |       |       |       |        |       |       |       |       |
| Glycerophospho-N-Arachidonoylethanolamine | others                            | 1.624 | 0.020 | 0.031 | 0.307  |       |       |       |        |       |       |       |       |
| LysoPE(20:5)                              | others                            | 1.808 | 0.005 | 0.016 | 0.367  | 1.115 | 0.037 | 0.047 | 1.412  |       |       |       |       |
| LysoPE(18:2)                              | others                            | 1.428 | 0.027 | 0.039 | 0.328  |       |       |       |        |       |       |       |       |
| PC(18:2)                                  | others                            | 2.145 | 0.000 | 0.003 | 0.404  | 2.478 | 0.000 | 0.000 | 0.719  | 1.903 | 0.003 | 0.016 | 0.316 |
| PC(22:6)                                  | others                            | 2.369 | 0.000 | 0.000 | 1.104  | 1.335 | 0.012 | 0.023 | -1.444 | 3.219 | 0.000 | 0.000 | 1.283 |
| Linoleyl carnitine                        | others                            | 1.620 | 0.017 | 0.029 | -0.329 | 1.721 | 0.001 | 0.004 | -0.466 |       |       |       |       |
| N-docosanoyl taurine                      | others                            | 2.193 | 0.001 | 0.005 | -1.096 |       |       |       |        |       |       |       |       |
| PC(20:4)                                  | others                            | 1.815 | 0.006 | 0.016 | 0.882  |       |       |       |        | 2.703 | 0.000 | 0.000 | 0.856 |
| Glycerophospho-N-Palmitoylethanolamine    | others                            | 2.854 | 0.000 | 0.000 | 0.638  | 1.049 | 0.026 | 0.038 | 0.469  | 1.388 | 0.011 | 0.043 | 0.243 |
| LysoPC(22:5)                              | others                            | 1.714 | 0.005 | 0.015 | 0.541  | 2.370 | 0.000 | 0.000 | 1.576  | 2.534 | 0.000 | 0.001 | 1.002 |
| LysoPE(18:3)                              | others                            | 2.835 | 0.000 | 0.000 | 0.640  | 1.948 | 0.000 | 0.000 | 2.293  | 1.518 | 0.012 | 0.045 | 0.764 |
| Palmitoyl-L-carnitine                     | Fatty acid degradation            | 1.445 | 0.040 | 0.050 | 0.185  | 1.281 | 0.009 | 0.018 | 0.307  |       |       |       |       |
| PC(16:0)                                  | others                            | 1.642 | 0.015 | 0.028 | 0.176  | 1.477 | 0.003 | 0.008 | 0.298  |       |       |       |       |
| LysoPC(18:3)                              | others                            | 2.941 | 0.000 | 0.000 | 0.228  | 2.220 | 0.000 | 0.000 | 0.277  | 2.101 | 0.001 | 0.009 | 1.633 |
| EPA                                       | Biosynthesis of unsaturated fatty | 2.053 | 0.003 | 0.012 | 0.697  | 1.712 | 0.001 | 0.003 | 0.756  |       |       |       |       |

|                                    |                                |       |       |       |       |       |       |       |        |       |       |       |        |
|------------------------------------|--------------------------------|-------|-------|-------|-------|-------|-------|-------|--------|-------|-------|-------|--------|
|                                    | acids                          |       |       |       |       |       |       |       |        |       |       |       |        |
| PC(38:8)                           | others                         | 1.785 | 0.003 | 0.012 | 1.698 |       |       |       |        |       |       |       |        |
| Adrenaline                         | Tyrosine metabolism            |       |       |       |       | 1.384 | 0.004 | 0.011 | 0.669  |       |       |       |        |
| Acetylcarnitine                    | others                         |       |       |       |       | 1.160 | 0.017 | 0.031 | -0.434 | 1.299 | 0.014 | 0.050 | -0.444 |
| Glycerophosphocholine              | others                         |       |       |       |       | 2.136 | 0.000 | 0.001 | 5.352  | 1.293 | 0.013 | 0.048 | -1.564 |
| Pyroglutamic acid                  | Glutathione metabolism         |       |       |       |       | 2.109 | 0.000 | 0.000 | 2.609  | 1.661 | 0.005 | 0.020 | 1.410  |
| Phenylpyruvic acid                 | Phenylalanine metabolism       |       |       |       |       | 1.535 | 0.006 | 0.014 | 0.406  | 1.420 | 0.012 | 0.044 | 0.334  |
| L-Phenylalanine                    | Cyanoamino acid metabolism     |       |       |       |       | 1.337 | 0.024 | 0.038 | 0.250  |       |       |       |        |
| Cystathionine                      | Biosynthesis of amino acids    |       |       |       |       | 1.747 | 0.001 | 0.004 | 0.536  |       |       |       |        |
| PGF1 $\alpha$                      | Arachidonic acid metabolism    |       |       |       |       | 1.022 | 0.027 | 0.040 | 1.453  |       |       |       |        |
| Taurocholic acid                   | Primary bile acid biosynthes   |       |       |       |       | 1.056 | 0.025 | 0.038 | 0.764  | 1.402 | 0.011 | 0.038 | 0.818  |
| LysoPE(20:4)                       | others                         |       |       |       |       | 1.687 | 0.001 | 0.003 | 0.482  |       |       |       |        |
| Taurodeoxycholic acid              | others                         |       |       |       |       | 1.174 | 0.020 | 0.035 | 0.322  |       |       |       |        |
| LysoPE(22:6)                       | others                         |       |       |       |       | 1.465 | 0.002 | 0.006 | 0.371  |       |       |       |        |
| LysoPC(22:6)                       | others                         |       |       |       |       | 1.629 | 0.001 | 0.003 | 1.240  |       |       |       |        |
| PE(16:0)                           | others                         |       |       |       |       | 2.415 | 0.000 | 0.000 | 0.824  |       |       |       |        |
| $\alpha$ -Linolenoyl Ethanolamide  | others                         |       |       |       |       | 1.571 | 0.006 | 0.014 | 0.174  |       |       |       |        |
| Arachidonoyl dopamine              | Primary bile acid biosynthesis |       |       |       |       | 1.646 | 0.001 | 0.003 | 2.229  |       |       |       |        |
| LysoPE(18:1)                       | others                         |       |       |       |       | 1.089 | 0.032 | 0.041 | 0.318  |       |       |       |        |
| PC(18:1)                           | others                         |       |       |       |       | 1.752 | 0.000 | 0.001 | 0.522  |       |       |       |        |
| Arachidyl carnitine                | others                         |       |       |       |       | 1.276 | 0.029 | 0.041 | -1.050 |       |       |       |        |
| PGF2 $\alpha$ Alcohol methyl ether | others                         |       |       |       |       | 1.094 | 0.023 | 0.038 | 1.701  | 1.562 | 0.010 | 0.032 | 1.738  |
| N $\alpha$ -Acetyl-L-glutamine     | others                         |       |       |       |       |       |       |       |        | 1.350 | 0.013 | 0.049 | -1.053 |
| Phosphocholine                     | Ether lipid metabolism         |       |       |       |       |       |       |       |        | 1.672 | 0.012 | 0.043 | 1.464  |
| LysoPC(20:3)                       | others                         |       |       |       |       |       |       |       |        | 2.867 | 0.000 | 0.001 | 0.921  |
| LysoPE(22:1)                       | others                         |       |       |       |       |       |       |       |        | 1.410 | 0.013 | 0.048 | 1.231  |

|                                                    |                                |       |       |       |        |       |       |       |        |       |       |       |        |
|----------------------------------------------------|--------------------------------|-------|-------|-------|--------|-------|-------|-------|--------|-------|-------|-------|--------|
| LysoPE(20:3)                                       | others                         |       |       |       |        |       |       |       |        | 1.600 | 0.010 | 0.035 | 1.657  |
| Cholic acid                                        | Primary bile acid biosynthesis | 2.249 | 0.007 | 0.017 | 2.730  |       |       |       |        | 2.117 | 0.011 | 0.038 | -3.003 |
| Cinnamic acid                                      | Phenylpropanoid biosynthesis   | 2.124 | 0.014 | 0.027 | -2.953 |       |       |       |        |       |       |       |        |
| corticosterone                                     | others                         |       |       |       |        | 1.671 | 0.040 | 0.050 | -1.317 |       |       |       |        |
| Deoxycholic acid                                   | Primary bile acid biosynthesis | 2.381 | 0.003 | 0.012 | 3.445  | 1.132 | 0.031 | 0.042 | 0.669  | 2.087 | 0.013 | 0.047 | -2.668 |
| D-Glucose 6-sulfate                                | others                         | 1.825 | 0.041 | 0.050 | -0.903 |       |       |       |        |       |       |       |        |
| Glucoheptonic acid                                 | others                         | 2.659 | 0.000 | 0.003 | 0.534  |       |       |       |        |       |       |       |        |
| Glycocholic Acid                                   | Primary bile acid biosynthesis |       |       |       |        | 1.201 | 0.023 | 0.038 | 2.167  | 2.070 | 0.002 | 0.011 | 0.685  |
| Indoxylsulfuric acid                               | others                         | 1.838 | 0.040 | 0.050 | -1.421 |       |       |       |        |       |       |       |        |
| Lipoxin C4                                         | others                         |       |       |       |        | 1.615 | 0.040 | 0.050 | -0.726 | 1.786 | 0.014 | 0.050 | -1.067 |
| PC(17:0)                                           | others                         | 1.855 | 0.039 | 0.049 | -0.311 |       |       |       |        |       |       |       |        |
| PC(18:3)                                           | others                         |       |       |       |        | 2.039 | 0.000 | 0.000 | 3.111  |       |       |       |        |
| PC(19:0)                                           | others                         | 2.041 | 0.020 | 0.031 | -0.866 |       |       |       |        |       |       |       |        |
| PE(20:3)                                           | others                         |       |       |       |        |       |       |       |        | 2.340 | 0.003 | 0.016 | 1.571  |
| Sphinganine-phosphate                              | sphingolipid metabolism        |       |       |       |        |       |       |       |        | 2.122 | 0.011 | 0.038 | 1.530  |
| Sphingosine-1-phosphate                            | sphingolipid metabolism        | 2.135 | 0.013 | 0.026 | -0.277 |       |       |       |        |       |       |       |        |
| Uric acid                                          | Purine metabolism              | 2.033 | 0.020 | 0.031 | 4.338  |       |       |       |        |       |       |       |        |
| $\alpha$ -D-Glucose/D-Fructose                     | Glycolysis / Gluconeogenesis   | 2.071 | 0.017 | 0.029 | 0.704  | 1.805 | 0.031 | 0.042 | 0.648  |       |       |       |        |
| $\gamma$ -Linolenic Acid/ $\alpha$ -Linolenic Acid | Linoleic acid metabolism       | 2.082 | 0.017 | 0.029 | 1.497  |       |       |       |        |       |       |       |        |
| 2-keto valeric acid                                | others                         |       |       |       |        | 2.044 | 0.011 | 0.022 | -1.510 | 2.137 | 0.010 | 0.038 | -1.620 |
| 3-Methylxanthine/7-Methylxanthine/1-Methylxanthine | Caffeine metabolism            |       |       |       |        | 1.922 | 0.019 | 0.034 | 1.905  | 1.886 | 0.012 | 0.042 | 2.143  |
| Arachidonic Acid                                   | Arachidonic acid metabolism    |       |       |       |        | 1.646 | 0.039 | 0.049 | -0.711 |       |       |       |        |
| Glycerophospho-N-Oleoyl Ethanolamine               | others                         | 1.325 | 0.041 | 0.050 | 0.409  | 1.918 | 0.000 | 0.001 | 0.689  |       |       |       |        |

|                       |                            |       |       |       |       |       |       |       |        |       |       |       |        |
|-----------------------|----------------------------|-------|-------|-------|-------|-------|-------|-------|--------|-------|-------|-------|--------|
| LysoPE(22:5)          | others                     |       |       |       |       | 1.189 | 0.014 | 0.026 | 0.553  | 1.946 | 0.003 | 0.016 | 0.584  |
| PC(14:0)              | others                     |       |       |       |       | 2.432 | 0.001 | 0.018 | 1.316  | 1.491 | 0.014 | 0.050 | 0.446  |
| PC(15:0)              | others                     | 2.439 | 0.000 | 0.003 | 0.368 | 2.345 | 0.002 | 0.006 | 0.545  | 1.835 | 0.013 | 0.046 | 0.447  |
| PE(16:1)              | others                     |       |       |       |       | 1.701 | 0.040 | 0.050 | 0.753  |       |       |       |        |
| PE(18:2)              | others                     |       |       |       |       | 1.820 | 0.029 | 0.041 | 0.633  |       |       |       |        |
| PE(18:3)              | others                     |       |       |       |       | 1.795 | 0.032 | 0.042 | 1.281  |       |       |       |        |
| Uridine monophosphate | Peptidoglycan biosynthesis |       |       |       |       | 1.636 | 0.038 | 0.049 | -1.513 | 1.861 | 0.011 | 0.037 | -1.727 |
| Xanthine              | Caffeine metabolism        |       |       |       |       | 1.627 | 0.039 | 0.050 | -1.040 |       |       |       |        |

<sup>a</sup>Abbreviations: T2DM, Health control, and DACD. <sup>b</sup>Variable importance in the projection (VIP) was obtained from PLS-DA with a threshold of 1.0. <sup>c</sup>The p-value and FDR-value were calculated from the nonparametric Kruskal–Wallis rank sum test. <sup>d</sup>Fold change (FC) was calculated from the mean values of each group.

---
