# Supplementary material for: Plasma Metabolomic Profiling of Patients with Diabetes-Associated Cognitive Decline
Source: PubMed Central journal article supplement (PMC4431856; doi:10.1371/journal.pone.0126952), 2015-05-14
Supplement: pone.0126952.s005.pdf [file pone.0126952.s005.pdf]

S2 Table. The informations of reference standards

| <b>Name</b>             | <b>Formula</b>      | <b>Mass</b> | <b>M+H</b> | <b>M+Na</b> | <b>M-H</b> | <b>M+FA-H</b> | <b>Rt(Standard)</b> | <b>Rt(sample)</b> |
|-------------------------|---------------------|-------------|------------|-------------|------------|---------------|---------------------|-------------------|
| Glycerophosphocholine   | $C_8H_{20}NO_6P$    | 257.1028    | 258.1106   | 280.092     | 256.0955   | 302.1014      | 0.70                | 0.70              |
| phytosphingosine        | $C_{18}H_{39}NO_3$  | 317.293     | 318.3003   | 340.2822    | 316.2857   | 362.2912      | 11.15               | 11.13             |
| Glycocholic acid        | $C_{26}H_{43}NO_6$  | 465.309     | 466.3163   | 488.2983    | 464.3018   | 510.3072      | 9.37                | 9.37              |
| Sphingosine-1-phosphate | $C_{18}H_{38}NO_5P$ | 379.2488    | 380.256    | 402.238     | 378.2415   | —             | 11.60               | 11.60             |
| sphinganine-phosphate   | $C_{18}H_{40}NO_5P$ | 381.2644    | 382.2717   | 404.2536    | 380.2571   | 426.2626      | 11.87               | 11.87             |
| Pyroglutamic acid       | $C_5H_7NO_3$        | 129.0426    | 130.0499   | 152.0318    | 128.0353   | 174.0408      | 0.75                | 0.75              |
| Hypoxanthine            | $C_5H_4N_4O$        | 136.0385    | 137.0458   | 159.0277    | 135.0312   | 181.0367      | 1.08                | 1.08              |
| Cholic acid             | $C_{24}H_{40}O_5$   | 408.2876    | —          | —           | 407.2803   | 453.2858      | 10.52               | 10.52             |
| Linoleic acid           | $C_{18}H_{32}O_2$   | 280.2402    | 281.2475   | 303.2295    | 279.233    | 325.2384      | 16.60               | 16.60             |
