# Supplementary material for: Plasma Metabolomic Profiling of Patients with Diabetes-Associated Cognitive Decline
Source: PubMed Central journal article supplement (PMC4431856; doi:10.1371/journal.pone.0126952), 2015-05-14
Supplement: pone.0126952.s006.pdf [file pone.0126952.s006.pdf]

S3 Table. the detailed results from the pathway analysis

| <b>Pathway</b>                                                                                                      | <b>Matched Entities</b> | <b>Pathway Entities of Experiment Type</b> | <b>Raw <i>P</i> value</b> |
|---------------------------------------------------------------------------------------------------------------------|-------------------------|--------------------------------------------|---------------------------|
| Hs_Selenium_Pathway_WP15_56489                                                                                      | 8                       | 105                                        | <0.001                    |
| Hs_Sphingolipid_Metabolism_WP1923_46972                                                                             | 4                       | 29                                         | <0.0007                   |
| Hs_Transport_of_glucose_and_other_sugars,_bile_salts_and_organic_acids,_metal_ions_and_amine_compounds_WP1935_45063 | 3                       | 29                                         | <0.02                     |
| Hs_Glucose_Homeostasis_WP661_45308                                                                                  | 3                       | 21                                         | <0.004                    |
| Hs_Drug_Induction_of_Bile_Acid_Pathway_WP2289_57150                                                                 | 3                       | 9                                          | <0.01                     |
| Hs_Metabolism_of_amino_acids_and_derivatives_WP1847_52373                                                           | 4                       | 135                                        | <0.005                    |
| purine nucleotides degradation II (aerobic)                                                                         | 3                       | 19                                         | <0.0004                   |
| Hs_Glucose_Homeostasis_WP661_34501                                                                                  | 3                       | 21                                         | <0.001                    |
| Hs_Metabolism_of_nucleotides_WP1851_44898                                                                           | 3                       | 81                                         | <0.01                     |
| adenosine nucleotides degradation II                                                                                | 3                       | 13                                         | <0.003                    |
| Hs_Glucose_Homeostasis_WP661_45308                                                                                  | 3                       | 21                                         | <0.004                    |
| Hs_Phase_1_-_Functionalization_of_compounds_WP1879_42095                                                            | 3                       | 102                                        | <0.01                     |
| Hs_Drug_Induction_of_Bile_Acid_Pathway_WP2289_57150                                                                 | 3                       | 9                                          | <0.002                    |
| Hs_Nucleotide_Metabolism_WP404_45328                                                                                | 3                       | 17                                         | <0.01                     |
| Hs_Transport_of_glucose_and_other_sugars,_bile_salts_and_organic_acids,_metal_ions_and_amine_compounds_WP1935_45063 | 3                       | 29                                         | <0.02                     |

Many pathways were tested at the same time, Raw *P* the original *P* value calculated from the enrichment analysis showing the *P* value of the changes in the pathway.
